# Supplementary material for: IL-17 induced NOTCH1 activation in oligodendrocyte progenitor cells enhances proliferation and inflammatory gene expression
Source: PubMed Central journal article supplement (PMC5460031; doi:10.1038/ncomms15508), 2017-05-31
Supplement: ncomms15508-s1.pdf [file ncomms15508-s1.pdf]

# Supplementary Information

## Supplementary Figure 1.

### NOTCH1

>gi|27894368|ref|NP\_060087.2| notch1 preproprotein [Homo sapiens]

```

MPPLIAPLLC LALLPALAAR GPRCSQPGET CLNGGKCEAA NGTEACVCGG AFGVGRCDP NPCLSTPCKN AGTCHVDDR GVADYACSCA LGFSGPLCLT PLDNACLTNP CRNGGTCDLL
TLTEYKCRCP PGWSGKSCQQ ADPCASNPCA NGGQCLPFEA SYICHCPPSF HGPTCRQDVN ECGQKPLGLCR HGGTCHNEVG SYRCVCRATH TGPNCERP YV PCSPPSPCQNG GTCRPTGDVT
HECACLPFGFT GQNCENIDD CPGNCKNGG ACVDGVNTYN CRCPEPWGQ YCTEDVDECQ LMPNACQNGG TCHNTHGGYN CVCVNGWTGE DCSENIDDC SAACFHGATC HDRVASFYCE
CPHGR TGLLC HLNDACISNP CNEGSNCDTN PVNGKAICTC PSGYTG PACS QDVDECSLGA NPCEHAGKCI NTLGSFECQC LQYTGPRCE IDVNECVSNP QNDATCLDQ IGEFQCICMP
GYEGVHCEVN TDECASSPCL HNGRCLDKIN EFQCECTGF TGHLCQYDVD ECAS TPCKNG AKCLDGPNTY TCVCTEGYTG THCEVDIDEC DPDPCHYGSC KDG VATFTCL CRPGYTGHHHC
ETNINECSSQ PCRHGGTQD RDNAYLCFCL KGTTPGNCEI NLDDCASSPC DSGTCLDKID GYECACEPGY TGS MCNINID ECAGNPCHNG GTCEDGINGF TCRCPEGYHD PTC LSEVNEC
NSNEPCVHGAC RDSLNGYKCD CDPGWSGTNC DINNNECESN PCVNGGTCCKD MTSYGVCTCR EGFSGPNCQT NINECASNPC LNQGT CIDDV AGYKCNCLLP YTGATCEVVL APCAPSPCRN
GGECRQSEYD ESFSCVCPGT WQAGQTCEDV INECVLSPCR HGASCQNTHG GYRCHCQAGY SGRNCETDID DCRNPCHNG GSCTDGINA FCDCLPGFGR TFCCEEDINEC ASDPCRNGAN
CTDCVDSYTC TCPAGFSGIH CENNTPDCTE SSCFNNGTICV DGINSF TCLC PPGFTGSYCQ HDVNECDSQP CLHGGTCQDG CGSYRCTCPQ GYTGPNCQL VHWCDSSPCK NGGKWCQIHT
QYRCECPGSG TGLYCDVPSV SCEVAAQRQG VDVARLCQHGL GLCVDAGNTH HCR CQAGYTG SYCEDLVDEC SPSPCQNGAT CTDYLGYSY KCVAGYHGVN CSEEIDECLS HPCQNGGTCL
DLNPTYKCS PRGTQGVHCE INVDDCNPPV DPVSRSPKCF NNGTCVDQVG GYSCTCPPGF VGERCEGDVN ECLSNPCDAR GTQNCVQRVN DFHCECRAGH TGRRCESVIN GCKGKPCCKNG
GTCAVASNTA RGFICKCPAG FEGATCENDA RTCGSLRCLN GGTCSIGPRS PTCCLCPFT GPECQFPASS PCLGPNPCYN QGTCEPTSES PFYRCLCPAK ENGLLCHILD YSFGGGAGRD
IPPLLEEAC ELPECQEDAG NKVCSLQCNN HACGWDGDC SLNFNDPWKN CTQSLQWKY FSDGHCDSDC NSAGCLFDGF DCQRAEGQCN PLYDQYCKDH FSDGHCDQGC NSAECEWDGL
DCAEHVPERL AAGTLVVVVL MPPEQLRNS FHFLELSRV LHTNVVFKRD AHGQQMIFPY YGEEELRKH PIKRAAEGWA APDALIGQVK ASLLPGGSEGR RRRELDPM DVRSIVYLE
IDNRQCVQAS SQCFQSATDV AAFGLALASL GSLNIPYKIE AVQSETVEPP PPAQLHFMYV AAAAFVLLFF VCGGVLLSRK RRRQHGLWF PEGFKVSEAS KKKRREPLGE DSVGLKPLKN
ASDGALMDDN QNEWGEDLE TKKFRFEEFV VLPDLDQTD HRQWTQQLD AADLRMSAMA PTPQGEVDA DCMVNVNVRGP DGF TPLMIAS CSGGGLETGN SEEEEDAPAV ISDFIYQ GAS
LHNQTDRTGE TALHHAARYS RSDAAKRLLE ASADANIQDN MGRTPHAAV SADAQGVFQI LIRNRTDLD ARMHDGTTPL ILAARLAVEG MLEDLINS HA DVNAVDDLK SALHWA AVN
NVDAAVVLLK NGANKDMQNN REETPLFLAA REGSYETAKV LLDHFANRDI TDHMDRLPRD IAQERMHDI VRLDEYNLV RSPQLHGAPL GGTPTLSPPL CSPNGYLGLS KPGVQGKVR
KPSKGLACG SKEAKDLKAR RKKSQDGKGC LLDSSGMLSP VDSLES PHGY LSDVASPPLL PPSFQQSPSV PLNHLPGMPD THLGIHLNV AAKPEMAALG GGGRLAFETG PPRLSHL PVA
SGTSTVLGSS SGGALNFTVG GSTSINGQCE WLSRLQSGMV PNQYNPLRGS VAPGPLSTQA PSLQHG MVGP LHSLSAASAL SQMMSYQGLP STRLATQPHL VQTQQVQPQN LQMQQNLQP
ANIQQQSLQ PPPPPPHL GVSSAASGHL GRSFLSGEPS QADVQPLGPS SLAVHTILPQ ESPALPTSLP SSLVPPVATA QFLTPPSQHS YSSPVDNTPS HQLQVPEHPF LTPSPESP DQ
WSSSSPHSNV SDWSEGVSSP PSMQSQIAR IPEAFK
    
```

MONO MW: 272394, pt: 4.95

Database = /home/sorcerer/fasta/RefSeq/Human\_082508.fasta

Links: [Google](#) [Google Scholar](#) [NCBI](#) [UniProtKB](#)

| Position  | Mass    | Peptide                 |
|-----------|---------|-------------------------|
| 177-190   | 1545.7  | QDVNECGQKPLGLCR         |
| 354-365   | 1367.58 | VASFYCECPHGR            |
| 1116-1133 | 1919.83 | LCQHGGGLCVDAGNTHHCR     |
| 1213-1235 | 2450.1  | GTQGVHCEINVDDCNPPVDPVSR |
| 1289-1297 | 1121.44 | VNDFHCECR               |
| 1600-1608 | 1055.61 | VLHTNVVFK               |
| 1651-1662 | 1099.56 | ASLLPGGSEGR             |
| 1928-1938 | 1138.61 | TGETALHHAAR             |
| 2080-2088 | 1083.58 | VLLDHFANR               |
| 2265-2273 | 986.52  | LAFETGPPR               |

NOTCH2

>gi|24041035|ref|NP\_077719.2| notch 2 preproprotein [Homo sapiens]

MPALRPALLW ALLALWLCCA APAHALQCRD GYEPVNEGM CVTYHNGTGY CK**CPEGFLGE YCQHRDPCEK** NRCQNGGTCV AQAMLGKATC RCASGFTGED CQYSTSHPCF VSRPCLNGGT  
 CHMLSR**DTYE CTQVGFYTK** ECQWTDACLS HPCANGSTCT TVANQFSCCK LTGFTGQKCE TDVNECDIPG HCQHGTCILN LPGSYQCQCP QGFTGQYCDL LYVPCAPSPC VNGGTCRQTG  
 DFTFECNCLP GFEGSTCERN **IDDCPNHR**CQ NGGVCVDGVN TYNCRCPQW TGFCTEDVD ECLLQPNACQ NGGTCANRNG GYGCVCVNGW SGDDCSENI DCAFASCTPG STCIDR**VASE**  
**SCMCPEGK**AG LLCHLDDACI SNPCHKGALC DTNPLNGQYI CTPQGYGA **DCTEDVDECA MANSNPCEHA GK**CVNTDGAF HCECLKGYAG PRCEMDINEC HSDPCQNDAT CLDK**IGGFTC**  
**LCMPGFK**GVH CELEINECQS NPCVNNQCV DKNVRFQCLC PPGFTGPVCQ IDIDDCSSTP CLNGAKCIDH PNGYECQCAT GFTGLVCEEN IDNCDPDPCH HGQCDGIDS YTCICNPGYM  
 GAICSDQIDE CYSSPCLNDG RCIDLVNGYQ CNCQPGTSGV NCEINFDCA SNPCIHGICM DGINR**YSCVC SPGFTGQR**CN IDIDEASNP CRKGATCING VNGFRCICPE GPHHPSCYSQ  
 VNECLSNPCI HGNCTGGLSG YKCLCDAGW GINCEVDKNE CLSNPCQNGG TCDNLVNGYR CTCKKGFYKY NCQVNIDECA SNPCLNQGTC FDDISGYTCH CVLPHYTK**NC QTVLAPCSPN**  
**PCENAAVCK**E SPNFESYTC L CAPGWQGRQ TIDIDECISK PCMNHGLCHN TQGSYMCECP PGFSGMDC EE DIDDCLANPC QNGGSCMDGV NTFSCCLLPG FTGDKCQDTM NECLSEPCKN  
 GGTCSDYVNS YTKCQAGFD GVHCENNINE CTESSCFNGG TCDVGINFS CLCPVGFYGS FCLHEINECS SHPCLNEGTC VDGLGTYR **CS CPLGYTGKNC QTLVNLCSR**S PCKNKGTCVQ  
**KAESQCLCP SGWAGAYCDV PNVSCDIAAS** RRGVLVEHLC QHSGVCINAG NTHYCQCP LG YTGSYCEEQL DECANSPCQH GATCSDFTGG YRCECVPGYQ GVNCEYEVDE CQNQCPCQNGG  
 TCIDLNVNHFK **CSCPPGTRGL LCEENIDDCAR** GPCHLNGGQ CMDR**IGGYSC R**CLPGFAGER CEGDINECLS NPCSSSEGLD CIQLTNDYLC VCRSAFTGRH CETFVDVCPQ MPCLNGGTCA  
 VASNMDFGI CR**CPGFGSAR** RCQSSCGQVK CR**KGEQCVHT ASGPRCFPCS PR**DCESGCAS SPCQHGGSCH PQR**QPPYISC QCAPPFSGSR** CELYTPPST PPATCLSYC ADKARDGVCD  
 EACNSHACQW DGGDCSLTME NPWANCSSPL PCWDYINNQC DELCNTVECL FDNFECQNS KTKYDKYCA DHFKDNHCDQ GCNSEECGWD GLDCAADQPE NLAEGLVIV VIMPPEQLLQ  
 DARSFLR**ALG TLLHTNLR**IK R**DSQELMVY PYYGK**SAAM KKQRMTRSL PGEQEQEVAG SKVLEIDNR QCVQSDHCF KNTDAAAALL ASHAIQGLS YPLVSVVSES LTPERTQLLY  
 LLAVAVVIL FILLGLVMA KRKRKHGSLW LPEGFTLRRD ASNHR**RREPV GQDAVGLK**NL SVQVSEANLI GTGTSEHWVD DEGPQPKVK AEDEALLSEE DDPIDRRPWT QQHLEAADIR  
 RTPSLALTPP QAEQEVDVLD VNVRPDGT PLMLASLRGG SSDLSDEDED AEDSSANIIT DLVYQASLQ AQTDRTGEMA LHLAARYSRA DAAKRLLDAG ADANAQDNMG RCPLHAAVAA  
 DAQGVFQILI RNRVTDLDR MNDGTPPLIL AARLAVEGMV AELINQADV NAVDDHGKSA LHWAAVMNV EATLLLLKNG ANRDMQDNKE ETPLFLAARE GSYEAAKILL DHFANRDTID  
 HMDRLPRDVA RDRMHHDIVR LLDEYNWTPS PPGTVLTSAL SPVICGPNRS FLSLKHTPMG KKSRRPSAKS TMPTSLPNLA KEAKDAKGR RKKSLSEKQV LSESSVTLSP VDSLESPTY  
 VSDTSSPMI TSPGILQASP NMLATAAPP APVHAQHALS FSNLHEMQPL AHGASTVLPV VSQLLSHHHI VSPGSGSAGS LSRLHPVFPV ADWMNRMEVN ETQYNEMFGM VIAPAEQTHP  
 GIAPQSRPE GKHIITPREP LPPIVTFQLI PKGSIAQFAG APQFQSTCPP AVAGPLPTMY QIPEMARLPS VAFPTAMMPQ QDGQVAQTIL PAYHPFPASV GKYPYTPSQH SYASSNAAER  
 TPSSHGLQG EHPYLTSPSE SPDQWSSSSP HSASDWSVDT TSPTPGGAGG GQRGPGTHMS EPPHNNMQVY A

MOWI MW: 265226, pt. 4, 95

Database = /home/sorcerer/fasta/RefSeq/Human\_082508.fasta

Links: [Google](#) [Google Scholar](#) [NCBI UniProtKB](#)

| Position  | Mass    | Peptide                               |
|-----------|---------|---------------------------------------|
| 53-65     | 1537.64 | <b>CPEGFLGEYCQHR</b>                  |
| 53-70     | 2109.87 | <b>CPEGFLGEYCQHRDPCEK</b>             |
| 127-140   | 1550.64 | <b>DTYECTQVGFYTK</b>                  |
| 260-268   | 1082.46 | <b>NIDDCPNHR</b>                      |
| 357-368   | 1257.52 | <b>VASFSCMCPEGK</b>                   |
| 409-432   | 2465.92 | <b>GADCTEDVDECAMANSNPCEHAGK</b>       |
| 475-487   | 1372.63 | <b>IGGFTCLCMPGFK</b>                  |
| 666-678   | 1403.6  | <b>YSCVCSPGFTGQR</b>                  |
| 829-849   | 2160.94 | <b>NCQTVLAPCSPNPCENAAVCK</b>          |
| 1049-1058 | 1027.45 | <b>CSCPLGYTGK</b>                     |
| 1059-1069 | 1249.59 | <b>NCQTLVNLCSR</b>                    |
| 1082-1111 | 3100.35 | <b>KAESQCLCPSGWAGAYCDVPNVSCDIAASR</b> |
| 1211-1218 | 819.34  | <b>CSCPPGTR</b>                       |
| 1219-1231 | 1449.62 | <b>GLLCEENIDDCAR</b>                  |
| 1245-1251 | 754.34  | <b>IGGYSCR</b>                        |
| 1333-1341 | 890.41  | <b>CPPGFSGAR</b>                      |
| 1353-1365 | 1368.66 | <b>KGEQCVHTASGPR</b>                  |
| 1366-1372 | 808.34  | <b>CFCPSPR</b>                        |
| 1394-1410 | 1886.81 | <b>QPPYISCQCAPPFSGSR</b>              |
| 1568-1578 | 1207.7  | <b>ALGTLHTNLR</b>                     |
| 1582-1596 | 1777.79 | <b>DSQELMVYPYYGK</b>                  |
| 1726-1738 | 1423.79 | <b>RREPVGQDAVGLK</b>                  |

## NOTCH3

>gi|134244285|ref|NP\_000426.2| Notch homolog 3 [Homo sapiens]

MGPGARGRR RRRPMSPPP PPPVRLPLL LLLAGPGAAA PPLDGLSPCA NGGR**CTQLPS REAACLCPPG WVGER**CQLED PCHSGPCAGR **GVCQSSVVAG TAR**FSCRCPR GFRGPDCLP  
 DPCLSSPCA GAR**CSVGPDG RFLCSCPPGY QGR**SCRSDVD ECRVGEPCR GGTCLNTPGS FRCQCPAGYT GPLCENPAVP CAPSPCRNGG TCRQSGDLTY DCACLPGFEG QNCEVNVDDC  
 PGHRCNLGGT CVDGVNTYNC QCPPEWTGQF CTEDVDECQL QPNACHNGGT CFNTLGGHSC VCVNGWTGES CSQNIDDCAT AVCFHGATCH DR**VASFYCAC PMGK**TGLLCH LDDACVSNPC  
 HEDAICDTPN VNGRAICTCP FGFTGGACDQ DVDECSIGAN PCEHLGRCVN TQGSFLCQCG RGYTGPCRET DVNECLSGPC RNQATCLDRI GQFTICMAG FTGTyceVDI DECQSSPCVN  
 GGVKCDRVNG FSCTCPSGFS GSTCQLDVDE CASTPCRNGA KCVDPDGYE CRCAEGFEGT LCDR**NVDDCS PDPCHHGR**CV DGIASFSCAC APGYTGTR**CE SQVDECR**SQP CRHGGKCLDL  
 VDKYLCRCPS GTTGVNCEVN IDDCASNPT FGVCRDGINR YDVCQPGFT GPLCNVEINE CASSPCGEGG SCVDGENGFR CLCPPGSLPP LCLPPSHPCA HEPCHGICY DAPGGFRCVC  
 EPGWSGPRCS QSIARDACES QPCRAGGTC SGMGFHCTC PPGVQGRQCE LLSPTPNPC EHGRCESAP GQLPVCSCPQ GWQGPCQQD VDECAGPAPC GPHICTNLA GSFSTCHGG  
 YTGPCSDQDI NDCDPNPNLN GSCQDGVGS FSCSCLPGFA GPCARDVDE CLSNPCGPGT CTDHVASFTC TCPGPGGFH CEQDLPCDSP SSCFNGGTCV DGVNSFSLC RPYTGAHQ  
 HEADPCLSRP CLHGGVCSAA HPGFRCTCLE SFTGPQCQTL VDWCSPQPCQ NGGRCVQTGA YCLCPPGWSG RLCDIRSLPC **EAAAQIGVR LEQLCQAGGQ CVDSDSSHYC VCPEGR**TGSH  
 CEQVDPCLA QPCQGGTGR GYMGYMEC LPYNGDNCE DDVDECASQP CQHGGSCIDL VARYLCSPP GTLGVLCIN EDDCGPGPPL DSGFRCLHNG TCVDLVGGFR CTCPPGYTGL  
**RCEADINECR** SGACHAAHTR **DCLQDPGGGF RCLCHAGFSG PRCQTVLSP** ESQPCQHGQ CRPSPGGGG LFTTCHCAQP FWGPRCERVA RSC**ELQCPV GVPCQQTPR** PR**CACPPGLS**  
**GPSCR**SFPGS PPGASNASCA AAPCLHGSC RPAPLAPFTR **CACAQWTGP RCEAPAAPE VSEEP**CPRA ACQAKRGDQR CDRECNSPGC GWDGGDCSLV VGFWR**QCEA LQCWR**LFNNS  
 RCDPACSSPA CLYDNFDCHA GGRER**TCNPV YEKYCADHFA DGR**CDQGCNT EECGWDGLDC ASEVPALIA RGVLVTLVLL PEELLRSSAD FLQRLSAILR TSLRFRLDH GQAMVFPYHR  
 PSPGSEPRAR RELAPEVIGS VMLEIDNRL CLQSPENDHC FPDAQSAADY LGALSVERL DFPYPLRVR GEPLPEPEPS VELLPLLVAG AVLLLVILVL GVMVARRKRE HSTLWFPEGF  
 SLHKDVASGH KGRREPVGQD ALGMKNMAK ESIIMGVATD WMDTECPK RLVKEPEMG AEEAVDCRQW TQHHLVAADI RVAPAMALTP PQGDADADM DVNVRGPDGF TPLMLASFEG  
 GALEMPTEE DEADTSASI ISDLICQGA LGARTDF**TGE TALHLAARY** RADAARLLD AGADTNAQDH SGRTPHHTAV TADAQGVFQI LIRNRSTDLD ARMADGSTAL ILAARLAVEG  
 MVEELIASHA DVNAVDELGK SALHWAAVN NVEATLALLK NGANKMQDS KEETPLFLAA REGSYEAKL LLDHFANREI TDHLDRPRD VAQERLHQDI VRLLDQSPGP RSPPGPHGLG  
 PLLCPPGAFI PGLKAAQSGS KKSRRPPGKA **GLGPGPR**GR GKLTTLACPG PLADSSVTLV PVDSLDSPRP FGGPPASPG FPELEGYAAA TATAVSLAQL GGPGRAGLGR QPPGGCVLSL  
 GLINPVAVPL DWARLPPAP PGFSLLPLA FGPQLLMPGT FVSPQERPPP YLAVPHGHEE YPAAGAHSSP PKARFLRVPS EHPYLTPSPE SPEHWASPS PSLSDWSEST PSPATATGAM  
 ATTTGALPAQ PLPLSVPSL AQAQTQLGPQ PEVTPKQVLA A

MONO MW: 243468, pt. 5.18  
 Database = /home/sorcerer/fasta/RefSeq/Human\_082508.fasta  
 Links: [Google](#) [Google Scholar](#) [NCBI](#) [UniProtKB](#)

| Position  | Mass    | Peptide                           |
|-----------|---------|-----------------------------------|
| 55-61     | 803.4   | <b>CTQLPSR</b>                    |
| 62-75     | 1486.67 | <b>EAACLCPPGWVGER</b>             |
| 91-103    | 1233.61 | <b>GVCQSSVVAGTAR</b>              |
| 134-141   | 789.34  | <b>CSVGPDGR</b>                   |
| 142-153   | 1326.58 | <b>FLCSCPPGYQGR</b>               |
| 333-344   | 1275.55 | <b>VASFYCACPMGK</b>               |
| 545-558   | 1550.6  | <b>NVDDCSPDPCHHGR</b>             |
| 579-587   | 1067.4  | <b>CESQVDECR</b>                  |
| 1042-1050 | 913.5   | <b>EAAAQIGVR</b>                  |
| 1051-1076 | 2825.15 | <b>LEQLCQAGGQCVDSDSSHYCVCPEGR</b> |
| 1202-1210 | 1051.41 | <b>CEADINECR</b>                  |
| 1221-1231 | 1163.5  | <b>DCLQDPGGGFR</b>                |
| 1232-1242 | 1146.51 | <b>CLCHAGFSGPR</b>                |
| 1295-1309 | 1653.8  | <b>ELQCPVGVPCQQTPR</b>            |
| 1313-1325 | 1246.53 | <b>CACPPGLSGPSCR</b>              |
| 1361-1371 | 1148.49 | <b>CACAQWTGPR</b>                 |
| 1372-1386 | 1554.7  | <b>CEAPAAPEVSEEP</b>              |
| 1427-1435 | 1135.49 | <b>QCEALQCWR</b>                  |
| 1466-1473 | 952.43  | <b>TCNPVYEK</b>                   |
| 1474-1483 | 1153.46 | <b>YCADHFADGR</b>                 |
| 1838-1848 | 1138.61 | <b>TGETALHLAAR</b>                |
| 2070-2078 | 851.46  | <b>AGLGPQGR</b>                   |

**Supplementary Figure 1. Mass spectrometry identification of NOTCH family proteins as Act1-interacting proteins.** HeLa cell lysates were immunoprecipitated with anti-Act1 antibody followed by mass spectrometry analysis of co-precipitated proteins. Co-immunoprecipitated proteins were identified by mass spectrometry. Shown are the NOTCH1, NOTCH2 and NOTCH3 peptides identified in the analysis.

**Supplementary Figure 2.**

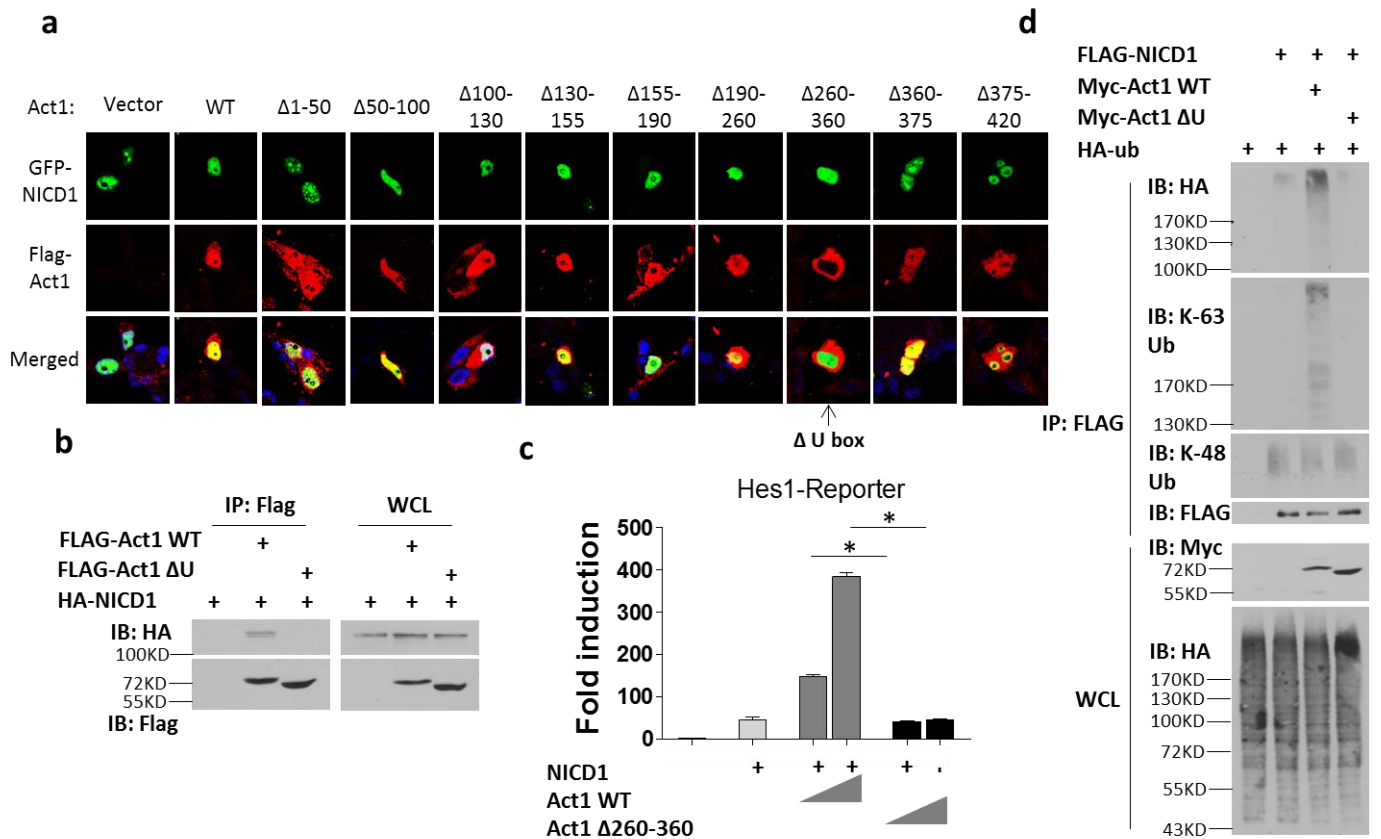

**Supplementary Figure 2. E3 ligase activity of Act1 is indispensable for engaging NOTCH pathway.** (a) HeLa cells were transfected with GFP-NICD and indicated Flag tagged wild-type Act1 or Act1 deletion mutants. Transfected cells were fixed and stained with anti-Flag antibody followed by analysis with confocal microscope under a 63X objective. Arrow indicates U box deletion mutant of Act1 ( $\Delta 260-360$ ) (b) HeLa cells were transfected with HA-NICD and vector, wild-type Act1 or U-box deletion mutant of Act1 (Act1  $\Delta$ U). Cell lysates were immunoprecipitated with anti-FLAG antibody, followed by immunoblot analysis for indicated proteins. IB: immunoblotting; IP: Immunoprecipitation, WCL: whole cell lysates. (c) HeLa cells were transfected with Hes1-luciferase reporter (100ng) alone or in combination with the different amounts of wild-type Act1 (200ng and 500ng) or Act1  $\Delta$ U (200ng and 500ng) and NICD1 (200ng). Data is reported as fold induction of luciferase activity in indicated transfection over Hes1-reporter transfection alone. Data are repeated two different experiments. (d) HeLa cells were transfected with HA-Ub in combination with wild-type myc-Act1, myc-Act1  $\Delta$ U and FLAG-NICD as indicated. Cell lysates were immunoprecipitated with anti-FLAG antibody, followed by immunoblot analysis for indicated proteins. IB: immunoblotting; IP: Immunoprecipitation, WCL: whole cell lysates. Data are representative of two independent experiments.

**Supplementary Figure 3.**

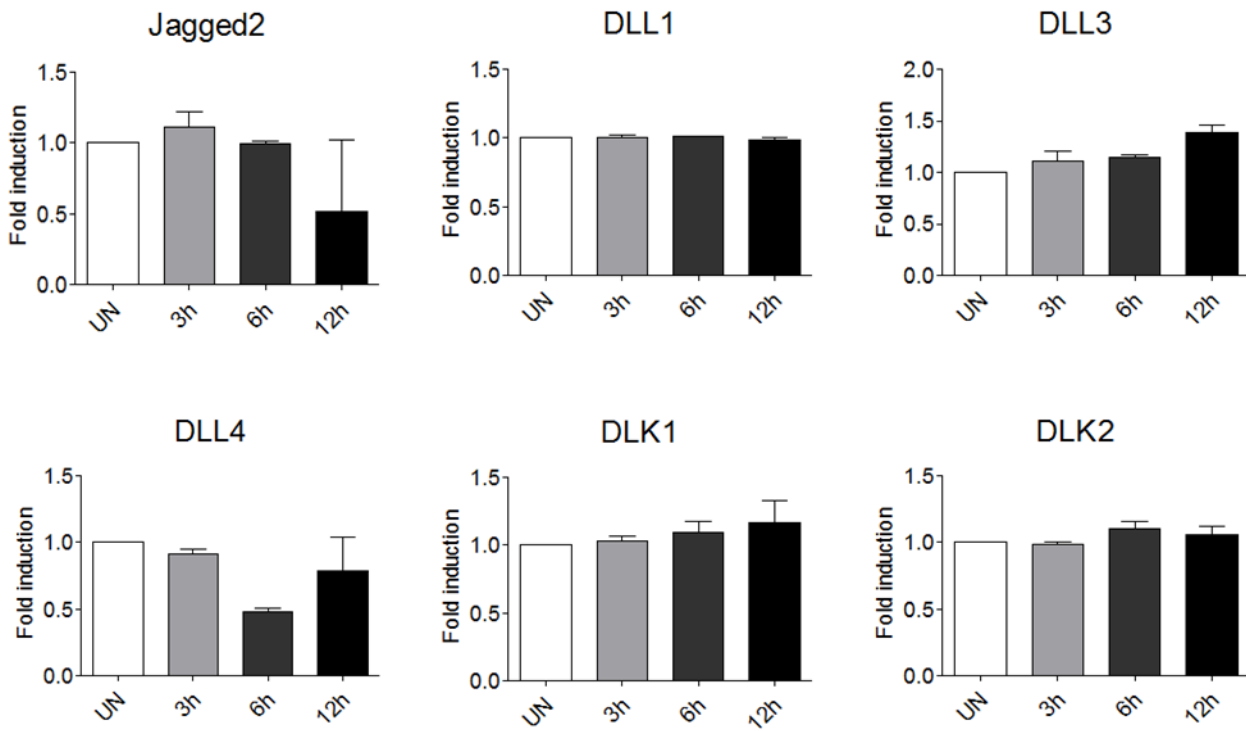

**Supplementary Figure 3. IL-17 stimulation does not induce NOTCH1 ligand expression in astrocytes.** Astrocytes were stimulated with IL-17 (50ng ml<sup>-1</sup>) for indicated time. Stimulated cells were subjected to RT-PCR analysis for the expression of indicated NOTCH ligand. Data are representative of two experiments.

Supplementary Figure 4.

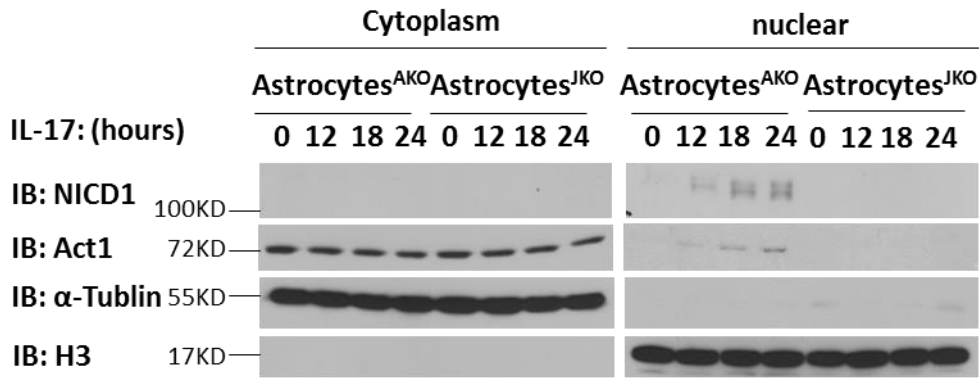

**Supplementary Figure 4. Jagged1 expressed in astrocytes is required for IL-17-induced Act1 nuclear translocation and OPCs maturation.** OPCs co-cultured with Act1 KO or Jagged1 KO astrocytes were left untreated or treated with IL-17 (50ng ml<sup>-1</sup>) for indicated time, followed by cell fractionation for cytoplasmic and nuclear proteins. Cell fractions were analyzed by immunoblot analysis for indicated proteins. Data are representative of two independent experiments.

Supplementary Figure 5.

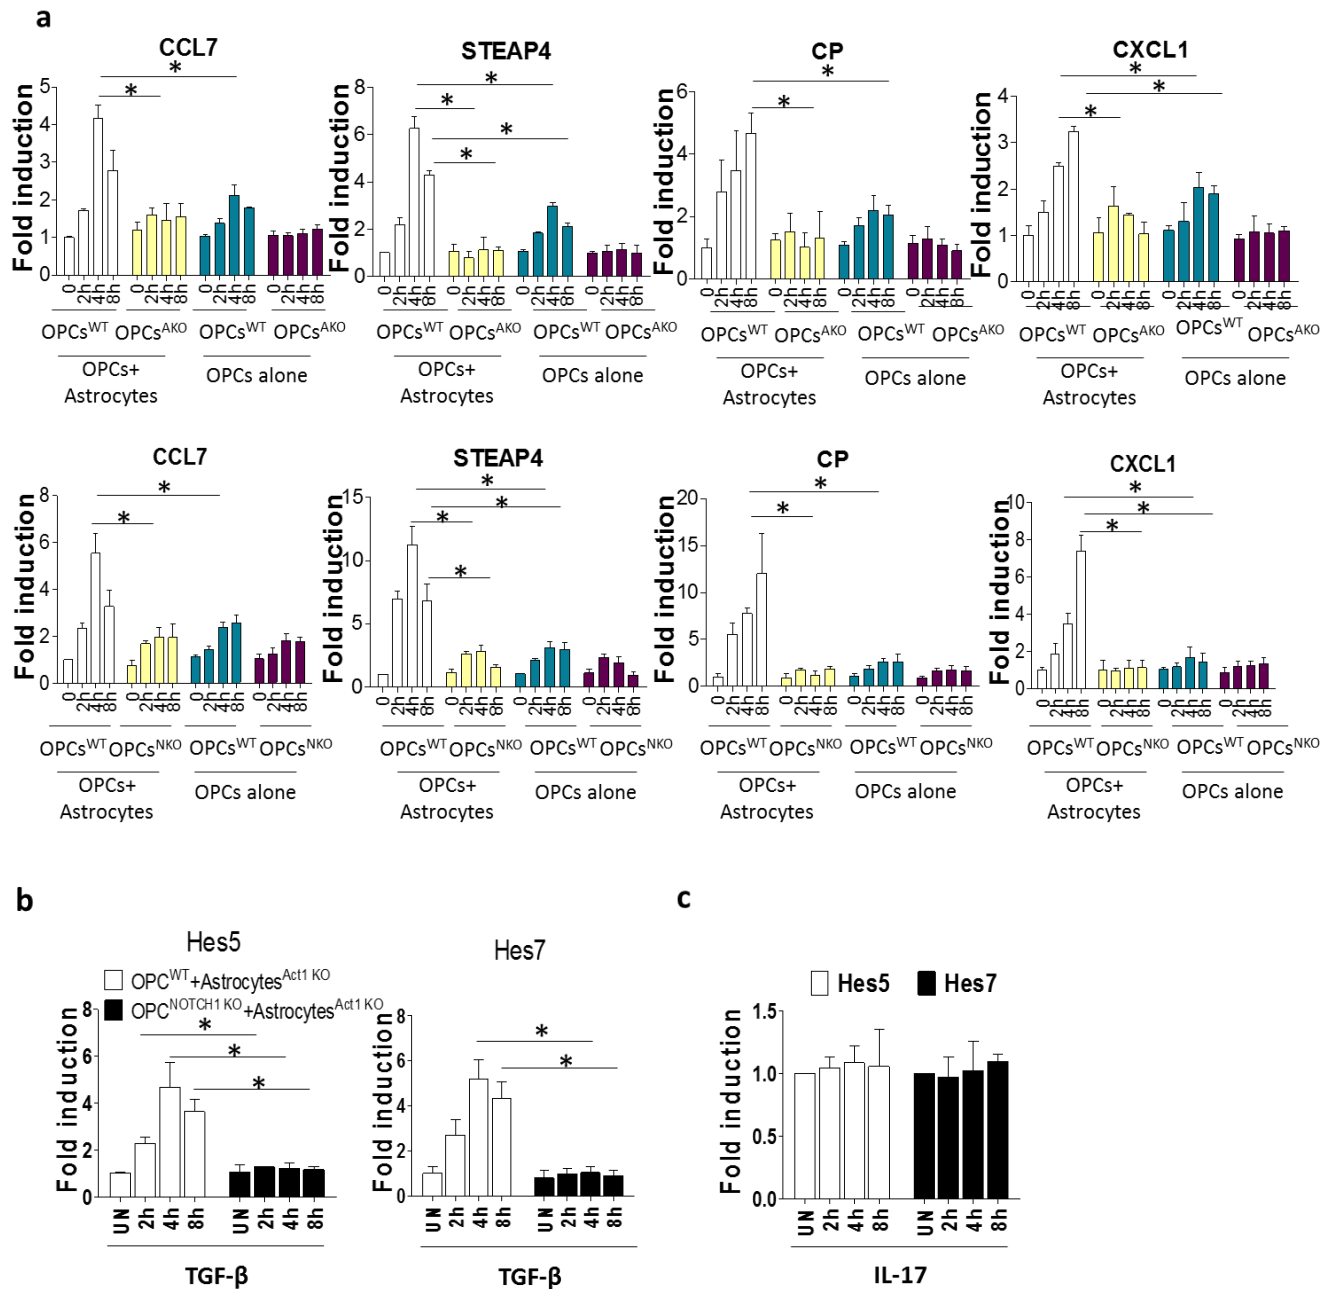

**Supplementary Figure 5. Differential regulation of gene expression by canonical IL-17 pathway and IL-17-NOTCH axis.** (a) Act1- and NOTCH1 -dependent genes. Wild-type, Act1 KO or NOTCH1 KO OPCs co-cultured with Act1 KO astrocytes were treated with IL-17 for indicated time, followed by real-time PCR analysis of different gene induction. (b) Wild-type or NOTCH1 KO OPCs co-cultured with Act1 KO astrocytes were treated with TGF $\beta$  for indicated time, followed by real-time PCR analysis of different gene induction. (c) OPCs co-cultured with Act1 KO astrocytes were stimulated with IL-17 for indicated time, followed by RT-PCR analysis for indicated genes. Error bars represent SEM of technical replicates. \*P < 0.05 based on Mann-Whitney U test. Data are representative of three independent experiments.

Supplementary Figure 6

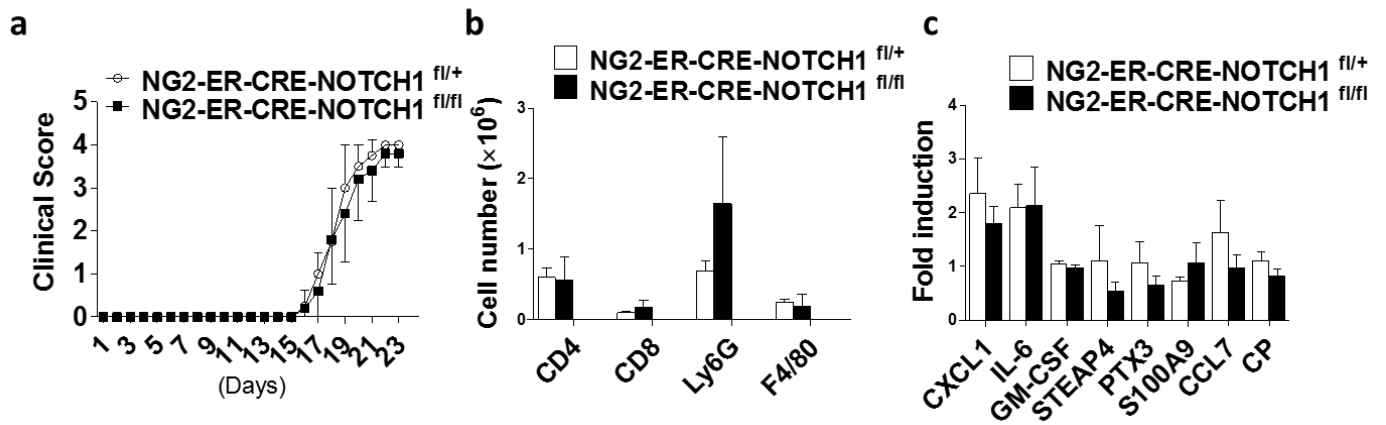

**Supplementary Figure 6. NOTCH1 deficiency in NG2+ cells does not affect Th1-induced EAE.**

**(a)** Mice (n=15) of indicated genotypes were adoptively transferred with MOG-reactive Th1 cells. Clinical scores of EAE symptoms are graphed over experimental time course. **(b)** Infiltrating cells from the brain of mice with Th1 induced EAE (n=5) were analyzed by flow cytometry at the peak of the disease. **(c)** RT-PCR analysis of inflammatory gene expression in spinal cords of mice (n=5) with Th1 induced EAE. All error bars represent SEM of biological replicates. \*: p<0.05 based on Mann-Whitney U test. Data are representative of three independent experiments.



Supplementary Figure 7

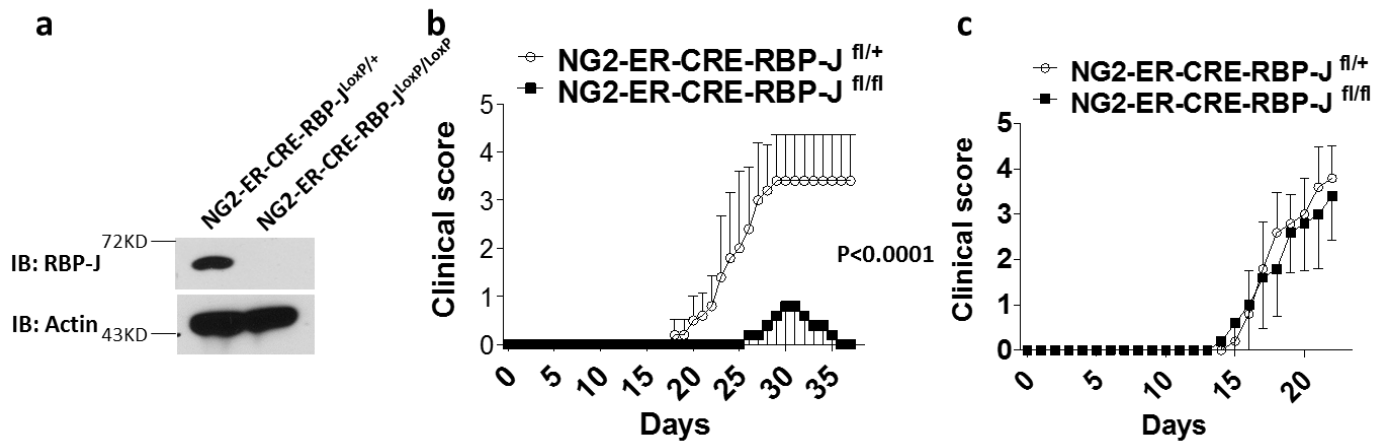

**Supplementary Figure 7. Ablation of RBP-J in OPCs ameliorates Th17- but not Th1-induced EAE.** (a) Immunoblot analysis of RBP-J expression in NG2<sup>+</sup> cells sorted from brains of indicated mice. (b) Mice of indicated genotypes were adoptively transferred with MOG-reactive Th17 cells (n = 5) to induce EAE. Clinical score of symptoms are graphed over the experimental time course. (c) Mice of indicated genotypes were adoptively transferred with MOG-reactive Th1 cells (n = 5) to induce EAE. Clinical score of symptoms are graphed over the experimental time course. Data are representative of three independent experiments.

## Supplementary Figure 8

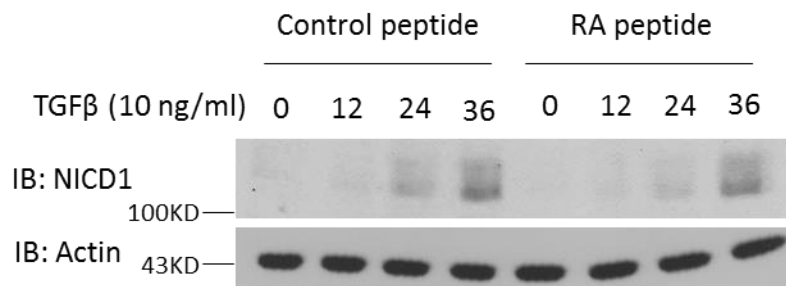

**Supplementary Figure 8. IL-17RA decoy peptide does not block TGF $\beta$ -induced NOTCH1 activation in OPC-astrocyte co-culture.** OPCs co-cultured with Act1 KO astrocytes were left untreated or treated with recombinant TGF $\beta$  (10ng ml<sup>-1</sup>) for indicated time, followed by immune blot for NICD1 and Actin. Data are representative of two independent experiments.

Supplementary Figure 9. Uncropped image of films for all the Figures.

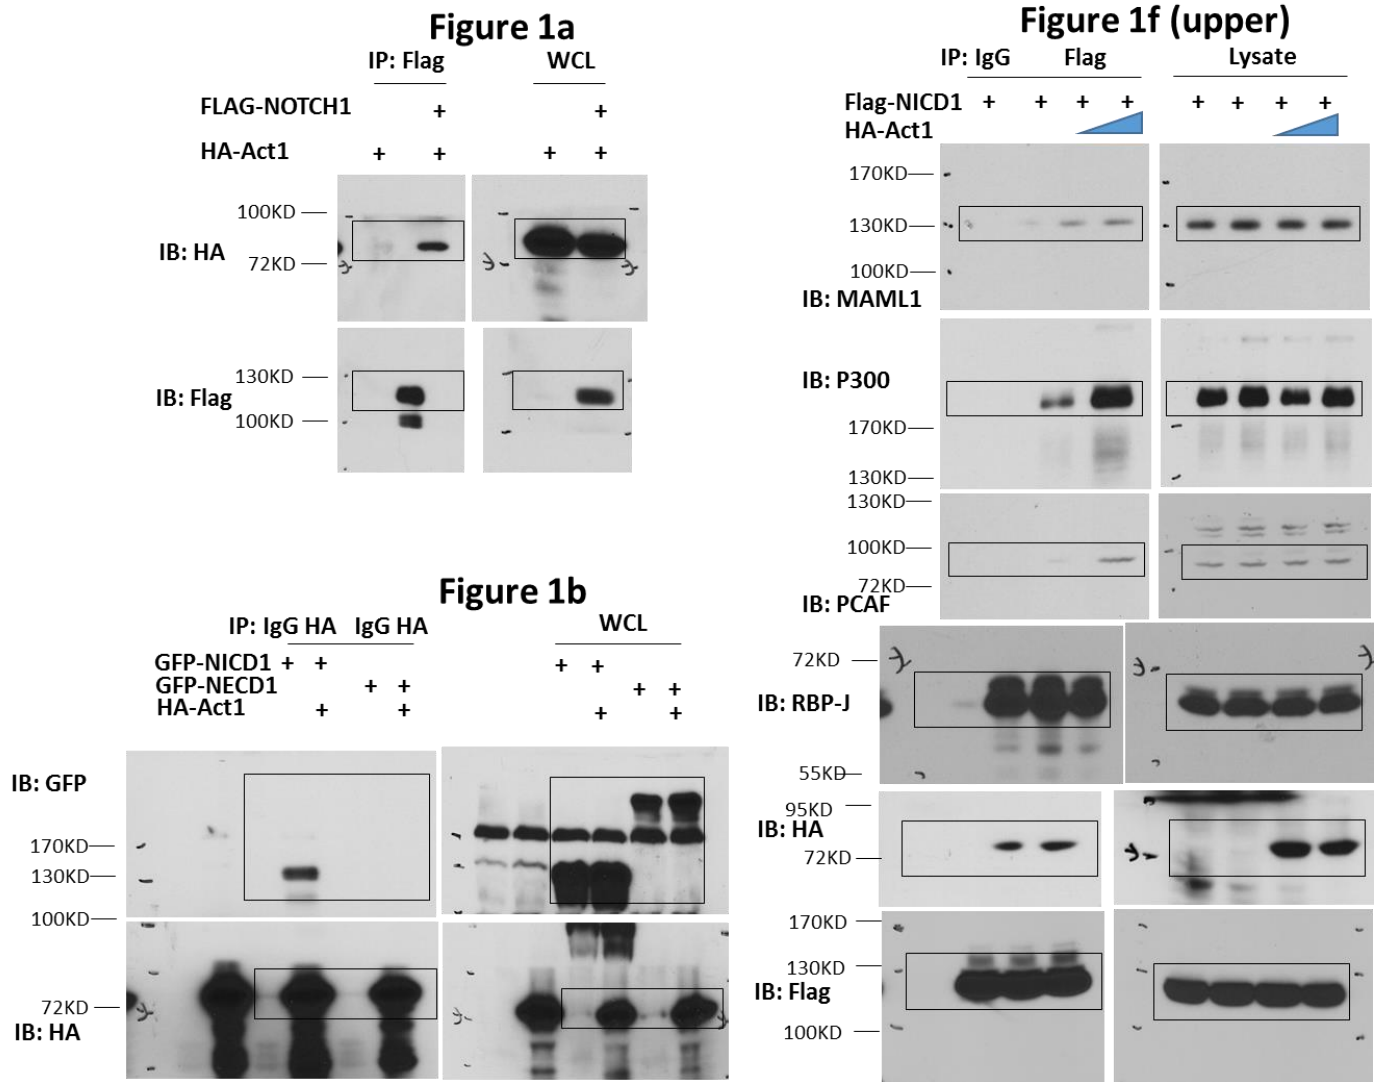

**Figure 1f (Lower)**

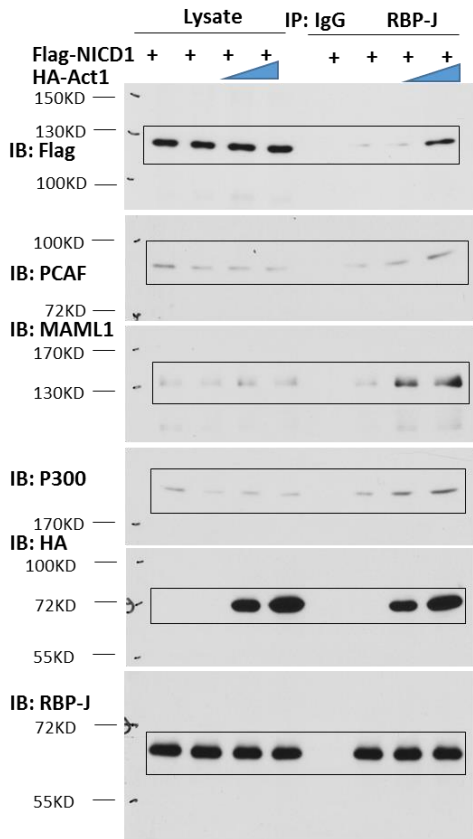

**Figure 2a**

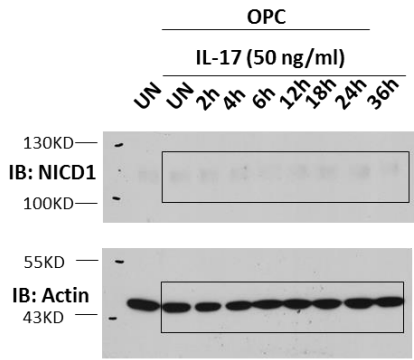

**Figure 2c**

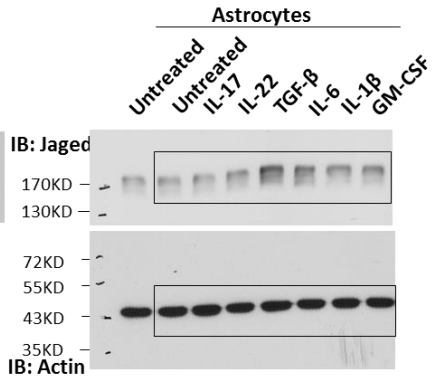

**Figure 2b**

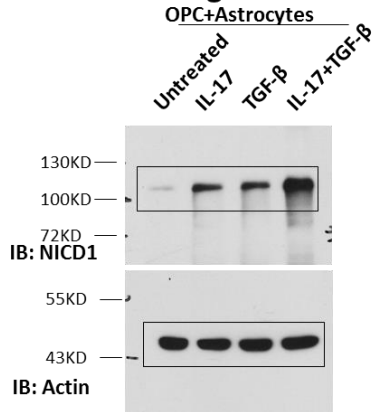

**Figure 2d (left)**

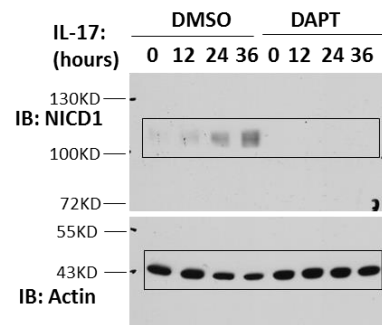

**Figure 2d (left)**

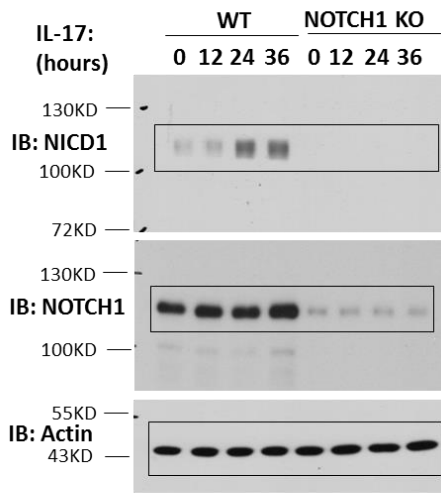

**Figure 2f**

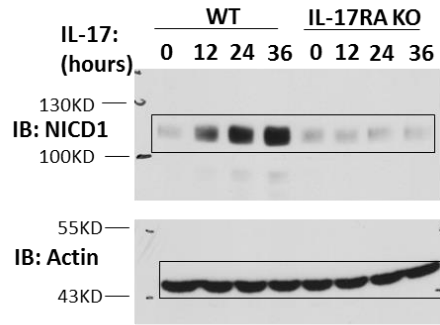

**Figure 2h**

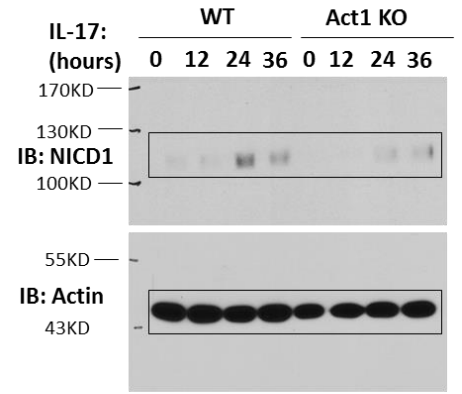

**Figure 2e**

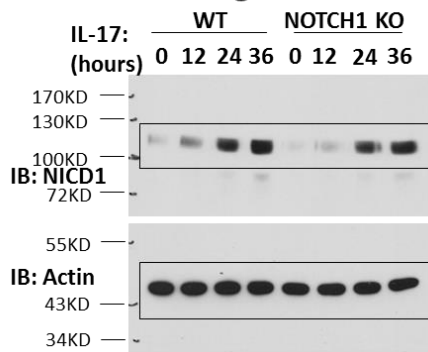

**Figure 2g**

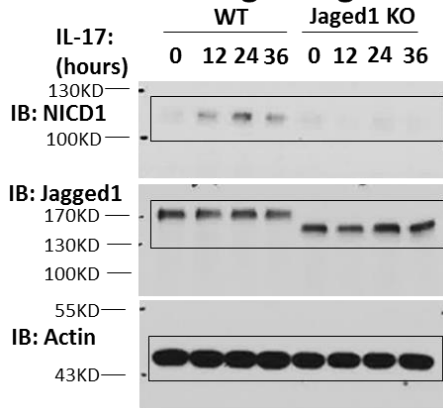

**Figure 2i**

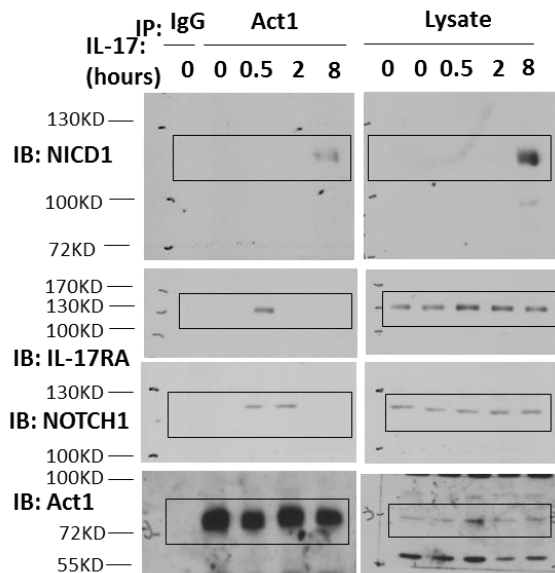

**Figure 3a**

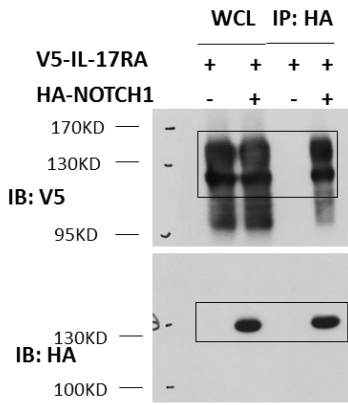

**Figure 3c left**

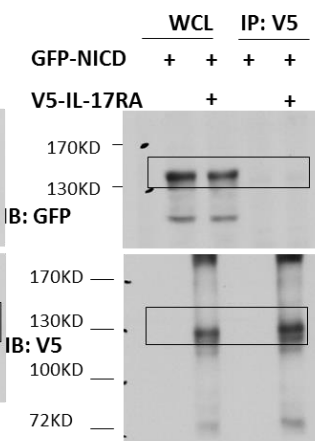

**Figure 3d**

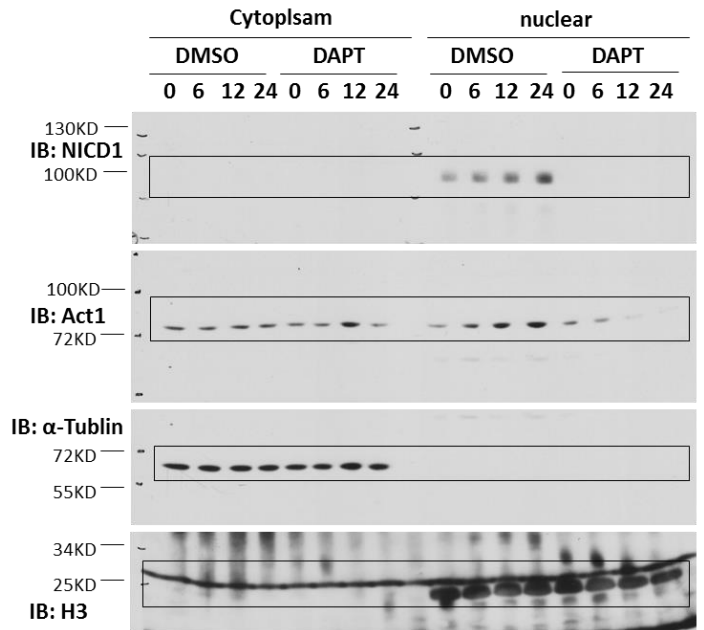

**Figure 3c right**

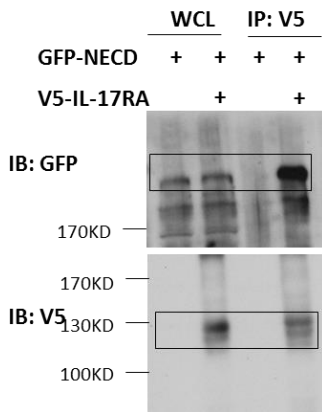

**Figure 3c**

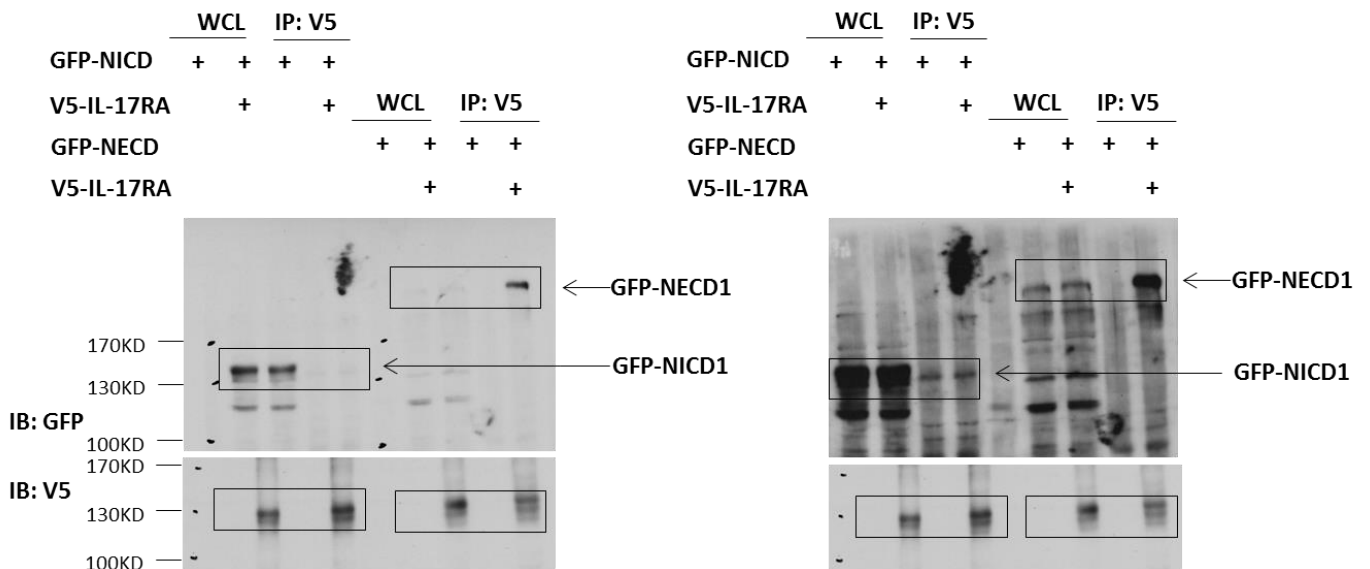

**Short exposure**

**Longer exposure**

**Figure 3e**

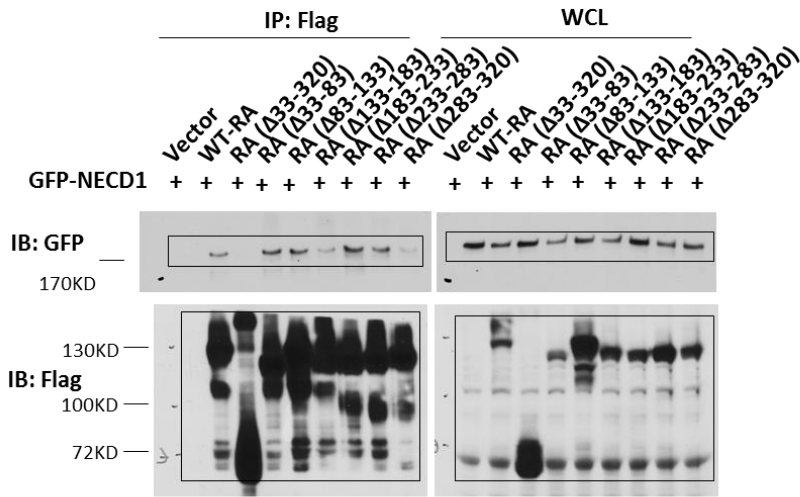

**Figure 6a**

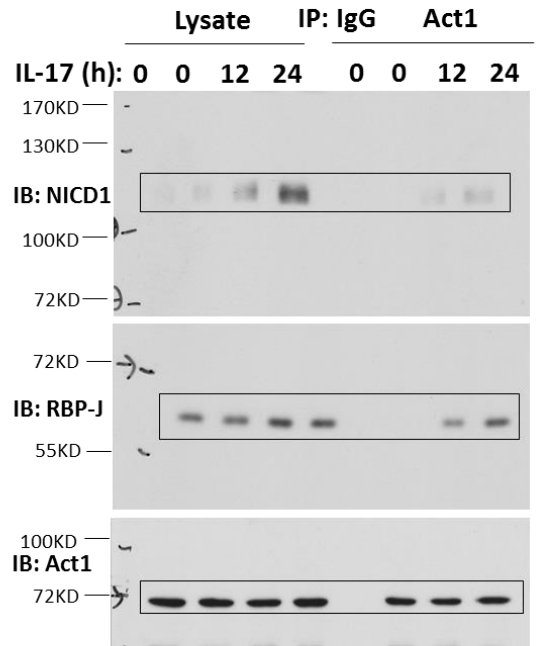

**Figure 6d**

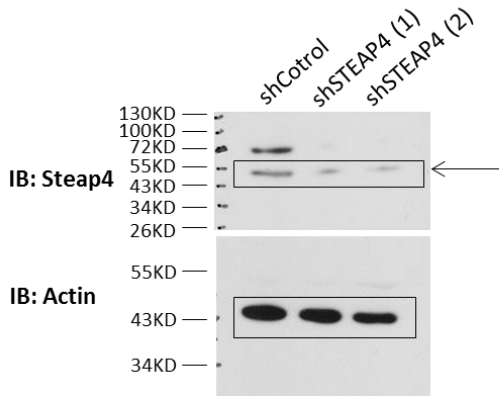

**Figure 9a**

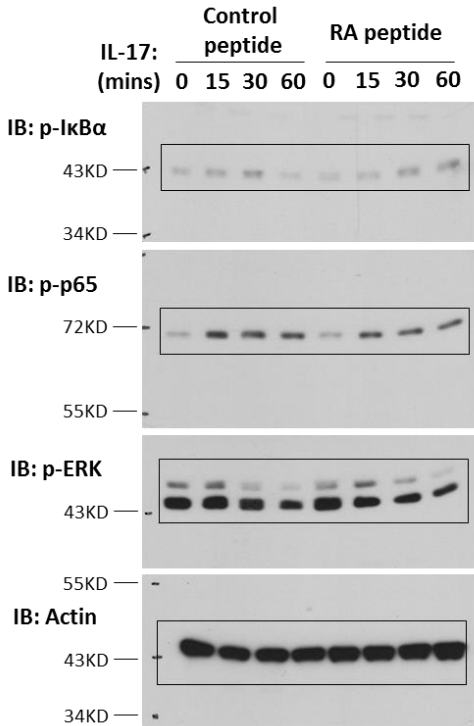

**Figure 9b**

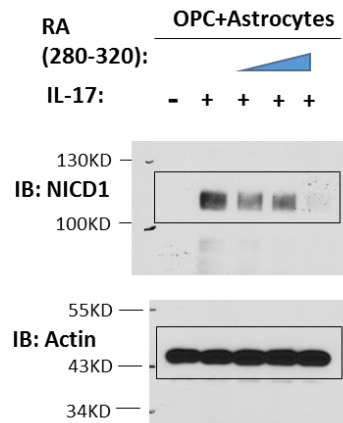

**Figure 9c**

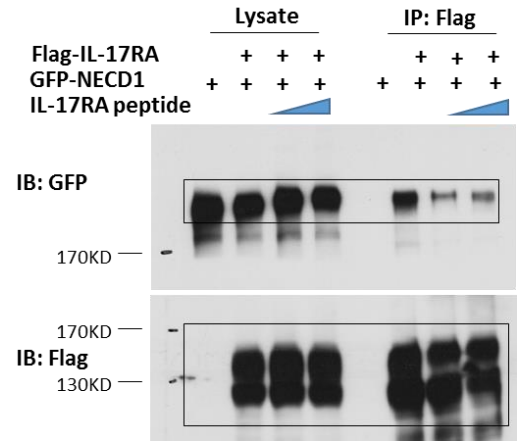

**Sup Figure 2a**

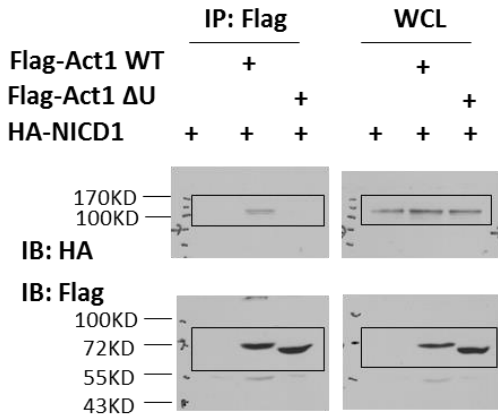

**Sup Figure 2c**

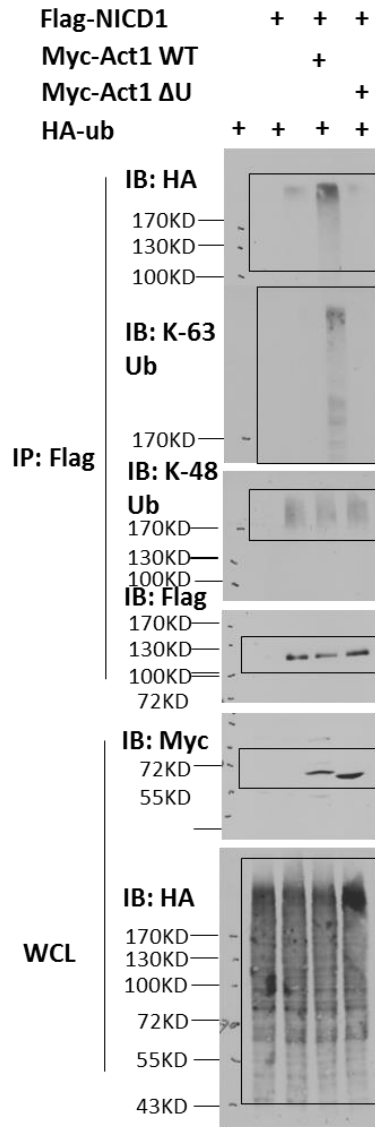

**Sup Figure 7a**

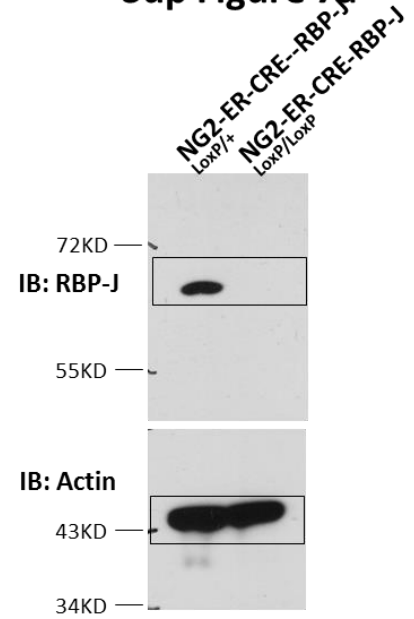

**Sup Figure 4**

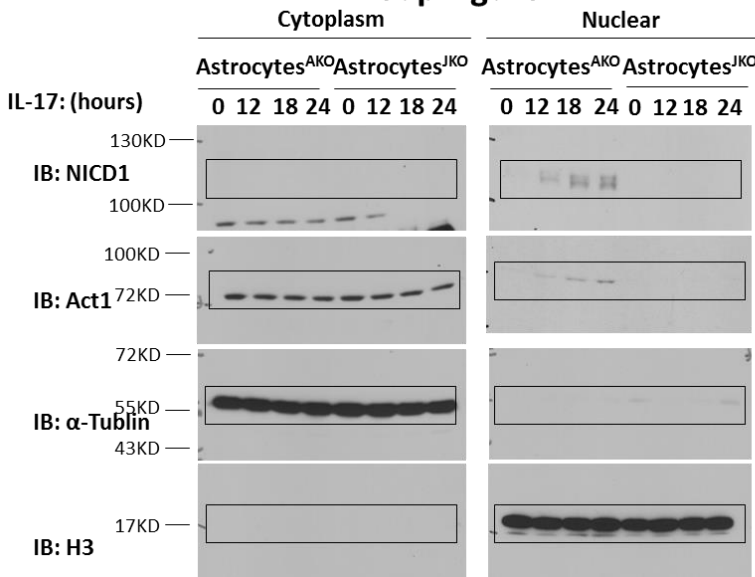

**Sup Figure 8**

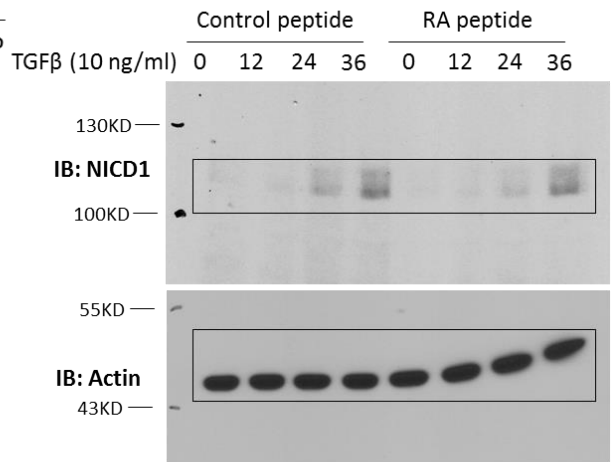



## Supplementary table 1: Primer sequence

| Gene name     | Forward primer               | Reverse Primer                |
|---------------|------------------------------|-------------------------------|
| <i>Ccl7</i>   | 5'-accagtagtcggtgtccctg-3'   | 5'-ctatagcctcctcgacccacttc-3' |
| <i>Steap4</i> | 5'-gaacactagatgcaagccgg-3'   | 5'-gagagatccttgggtccagtgg-3'  |
| <i>Ptx3</i>   | 5'-gggtggactcctacagattgg-3'  | 5'-ctgagaacccgatcccagat-3'    |
| <i>Csf2</i>   | 5'-ctaacatgtgtgcagaccg-3'    | 5'-gtctggtagtagctggctgtc-3'   |
| <i>Ccl20</i>  | 5'-cacaagacagatggccgatg-3'   | 5'-cccttttcacccagttctgc-3'    |
| <i>Cxcl1</i>  | 5'-ccagagcttgaaggtgttc-3'    | 5'-tgaaccaaggagcttcagg-3'     |
| <i>Cp</i>     | 5'-gtgactgtaacaagccctcg-3'   | 5'-agtgaagatgtccgtcccag-3'    |
| <i>Mmp9</i>   | 5'-cgacatagacggcatccagt-3'   | 5'-gataggccgtgggaggtatag-3'   |
| <i>S100a9</i> | 5'-ggccaacaaagcaccttctc-3'   | 5'-tccttcttgctcagggtgtc-3'    |
| <i>Hes5</i>   | 5'-tgcaccaggactacagcgag-3'   | 5'-cgctggaagtggtaaagcag-3'    |
| <i>Hes7</i>   | 5'-catcaaccgcagcctagaag-3'   | 5'-cgaactccagtatctccgct-3'    |
| <i>Mbp</i>    | 5'-cttcagaccatccaagaagacc-3' | 5'-gtacttgctgtggccaggtact-3'  |
| <i>Mag</i>    | 5'-tcaaggagaagcagatcctagc-3' | 5'-tctcagccacacaccagtattc-3'  |
| <i>Mog</i>    | 5'-ccttctcaagagtggttcacct-3' | 5'-gggtaacctttccctcactgat-3'  |

| Gene name                          | Forward primer                                                                  | Reverse Primer                                                                   |
|------------------------------------|---------------------------------------------------------------------------------|----------------------------------------------------------------------------------|
| <i>IL-17RA</i><br>$\Delta$ 33-320  | 5'<br>-CTGGGCGTGCTGGCCCCGGGTGGC<br>GCCTCCGTGTACTGGTTCATCACGG<br>GCATCTCCATCC-3' | 5'<br>-GGATGGAGATGCCCCGTGATGAACCAGTA<br>CACGGAGGCGCCACCCGGGGCCAGCACGC<br>CCAG-3' |
| <i>IL-17RA</i><br>$\Delta$ 33-83   | 5'<br>-CGTGCTGGCCCCGGGTGGCGCCTCC<br>CACACCCAACAAGGAGACCTGTTCC<br>-3'            | 5'<br>-GGAACAGGTCTCCTTGTGGGTGTGGGAG<br>GCGCCACCCGGGGCCAGCACG-3'                  |
| <i>IL-17RA</i><br>$\Delta$ 83-133  | 5'<br>-GGACCTGCAGATCCAGCTGCACTTT<br>AAACTGAGGCATCACACAGGCGGT<br>-3'             | 5'<br>-ACCGCCTGTGGTGATGCCTCAGTTTAAAG<br>TGCAGCTGGATCTGCAGGTCC-3'                 |
| <i>IL-17RA</i><br>$\Delta$ 133-183 | 5'<br>-GTGCGTCAGGTTTGAGTTTCTGTCC<br>GACTGTGAGCACGCCAGGATGAAGG<br>-3'            | 5'<br>-CCTTCATCCTGGCGTGCTCACAGTCGGAC<br>AGAAACTCAAACCTGACGCAC-3'                 |
| <i>IL-17RA</i><br>$\Delta$ 183-233 | 5'<br>-CCAGTCCAAGAATTCCTTGTGCCT<br>CTGACCAGTTTTCCGCACATGGAGA-<br>3'             | 5'<br>-TCTCCATGTGCGGAAAACCTGGTCAGAGGC<br>ACAAGGAAATTCTTGGACTGG-3'                |
| <i>IL-17RA</i><br>$\Delta$ 233-283 | 5'<br>-CGAATCTACCCATTACCAGATCCTG<br>CAGCCCTTCTTCAGCAGCTGCCTCA-<br>3'            | 5'<br>-TGAGGCAGCTGCTGAAGAAGGGCTGCAG<br>GATCTGGTAATGGGTAGATTCG-3'                 |
| <i>IL-17RA</i><br>$\Delta$ 283-320 | 5'<br>-GGTGCTGTGCGCCACCAAGTGCAGAT<br>CGTGTACTGGTTCATCACGGGCATC<br>T-3'          | 5'<br>-AGATGCCCCGTGATGAACCAGTACACGATC<br>TGCACCTTGGTGGCGACAGCACC-3'              |

| Gene name                       | Forward primer                                                          | Reverse Primer                                                     |
|---------------------------------|-------------------------------------------------------------------------|--------------------------------------------------------------------|
| <i>Act1</i><br>$\Delta 150-100$ | 5'<br>-AGAACCACCTGCTCCAAATATAAG<br>GGAAGACAGTTTCTGCAGGAGACA<br>CC-3'    | 5'<br>-GGTGTCTCCTGCAGAACTGTCTTCCCTT<br>ATATTTGGAGCAGGTGGTTCT-3'    |
| <i>Act1</i><br>$\Delta 100-130$ | 5'<br>-GCACTCAAGTTCTGGAGGACGTTG<br>GAGCCCTCCCTGCAGA-3'                  | 5'<br>-TCTGCAGGGAGGGCTCCAACGTCTCCAG<br>AACTTGAGTGC-3'              |
| <i>Act1</i><br>$\Delta 130-155$ | 5'<br>-GCGAGCCTGCGTCTGAGTCTGCGG<br>CTTCTCCTGACACTGG-3'                  | 5'<br>-CCAGTGTCAGGAGAAGCCGCAGACTCAG<br>ACGCAGGCTCGC-3'             |
| <i>Act1</i><br>$\Delta 155-190$ | 5'<br>-GTAATCAATGGCTGGTATCTCAGC<br>TTCAGCCTCACAGGAACCGAGCAG<br>GCC-3'   | 5'<br>-GGCCTGCTCGGTTCTGTGAGGCTGAAGC<br>TGAGATACCAGCCATTGATTAC-3'   |
| <i>Act1</i><br>$\Delta 190-260$ | 5'<br>-CGGTAGCCAGGAGATGGTGCAACG<br>GCCTCCAATCTTTCCCCACATGCT<br>C-3'     | 5'<br>-GAGCATGTGGGGAAAGATTGGGAGGCCG<br>TTGCACCATCTCCTGGCTACCG-3'   |
| <i>Act1</i><br>$\Delta 260-360$ | 5'<br>-GAGGTATCCAGCATGTGCACAGAT<br>GGCTGGTGCTCCTGGGGAGTCCTTG<br>G-3'    | 5'<br>-GCTGGGGAACCTGTGGATTAGGTGGCTGG<br>TGA-3'                     |
| <i>Act1</i><br>$\Delta 360-375$ | 5'<br>-TCACCAGCCACCTAATCCACAGGT<br>TCCCCAGC-3'                          | 5'<br>-AGATGCCCCGTGATGAACCAGTACACGATC<br>TGCACTTGGTGGCGACAGCACC-3' |
| <i>Act1</i><br>$\Delta 375-420$ | 5'<br>-GGAGTCCTTGGAGTGCCCTGCAGA<br>GCTGGCTATGGAGGTGGTGAAATT<br>CGTGA-3' | 5'<br>-TCACGAATTTACCACCTCCATAGCCAGC<br>TCTGCAGGGCACTCCAAGGACTCC-3' |

## Supplementary table 2 : ChIP primer sequence

| Gene name           | Forward primer                   | Reverse Primer                |
|---------------------|----------------------------------|-------------------------------|
| <i>CXCL1 ChIP</i>   | 5'<br>-TTGGCTCCTGAGTCTAAGAA-3'   | 5' -GTAAAAGTCTTTGAATATT-3'    |
| <i>S100A9 ChIP</i>  | 5' -GGTTGCCAACTGTGCTTCCA-3'      | 5' -ATGGCCAACAAAGCACCTTCT-3'  |
| <i>PTX3 ChIP</i>    | 5'<br>-AGGGTAGTAGCCCTGCCATC-3'   | 5' -GAACCACTCCCAGAGGATACC-3'  |
| <i>STEAP4 ChIP</i>  | 5'<br>-TGGCATCCATTTAGGTAACAT-3'  | 5' -CTCTGTGTTCTCCAGGGCT-3'    |
| <i>CCL7 ChIP</i>    | 5'<br>-CCCTGCCCTTGCCTAATACTC-3'  | 5' -AAGTGTCCAGGCACATAGGC-3'   |
| <i>CP ChIP</i>      | 5'<br>-TATACATTTAGATACATGCCAC-3' | 5' -GAATGATTTTACTCAACTGGAA-3' |
| <i>Control ChIP</i> | 5'<br>-TCGATATCCACGTGACATCCA-3'  | 5' -GCAGCATTTTTTTTACCCCCTC-3' |
